# Supplementary material for: Polycomb repressive complex 1 shapes the nucleosome landscape but not accessibility at target genes
Source: PubMed Central journal article supplement (PMC6169895; doi:10.1101/gr.237180.118), 2018-10
Supplement: supp_gr.237180.118_Supplemental_Figures.pdf [file supp_gr.237180.118_Supplemental_Figures.pdf]

## Supplemental Figure S1

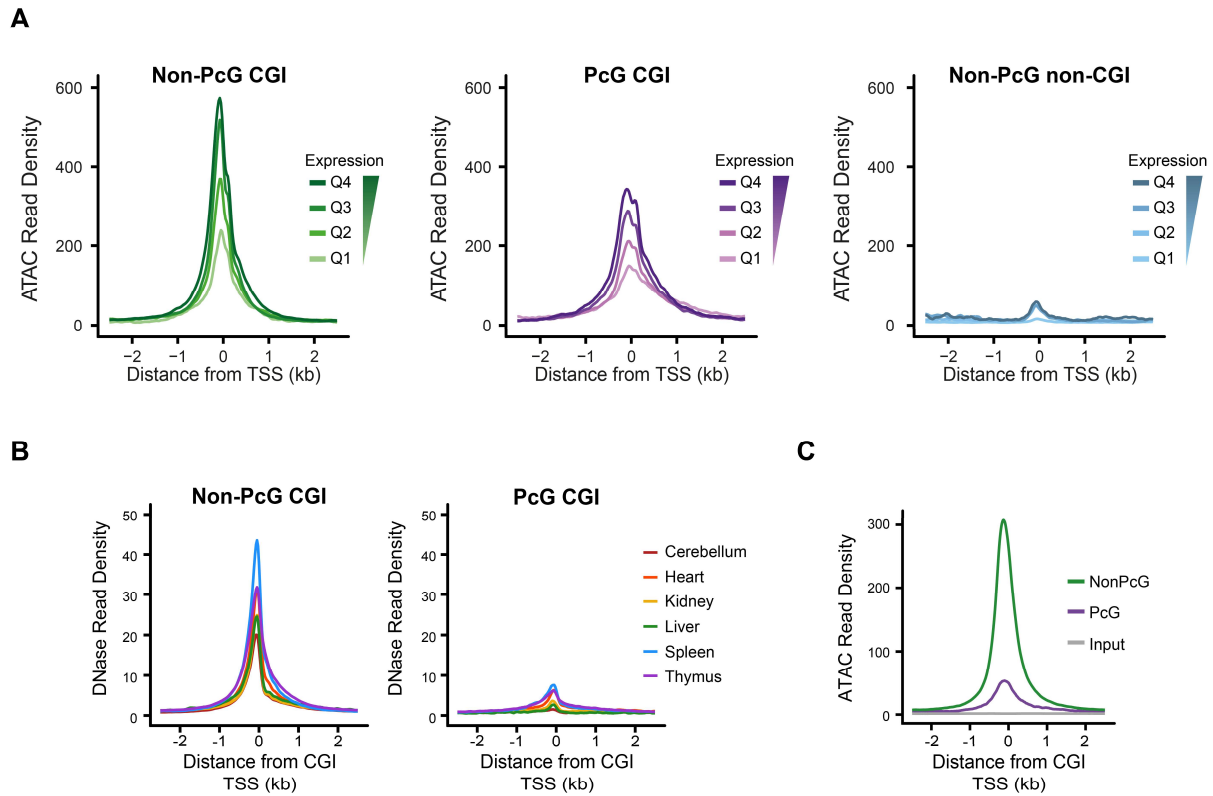

### Supplemental Figure S1. Analysis of chromatin accessibility at Polycomb and non-Polycomb CGI promoters.

- A) A metaplot analysis of wild type mouse ESC ATAC-seq profiles at non-PcG CGI, PcG-bound CGI and non-CGI PcG-free promoters at different gene expression quartiles (Q1 lowest -> Q4 highest), centred on the TSS.
- B) A metaplot analysis of ENCODE DNase-seq for different mouse tissues at H3K27me3-positive or H3K27me3-negative non-methylated CGI promoters, centred on the TSS.
- C) A metaplot analysis of wild type mouse embryonic fibroblast ATAC-seq profiles at H3K27me3-positive (PcG;  $n = 1438$ ) or H3K27me3-negative CGI promoters (Non-PcG;  $n = 10118$ ), centred on the TSS.

## Supplemental Figure S2

**A**

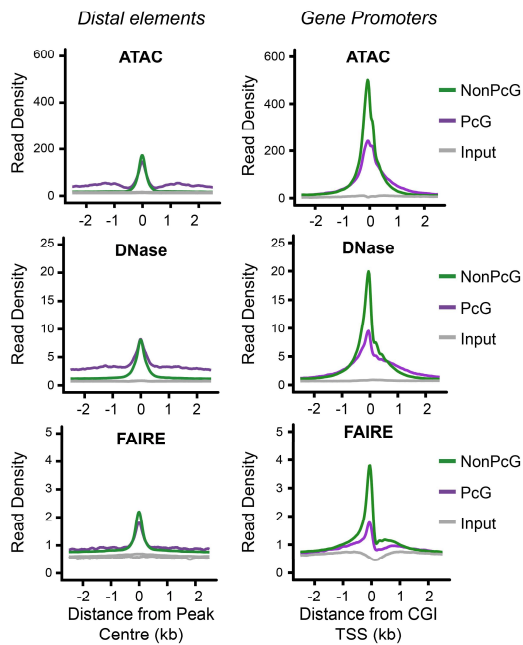

**B**

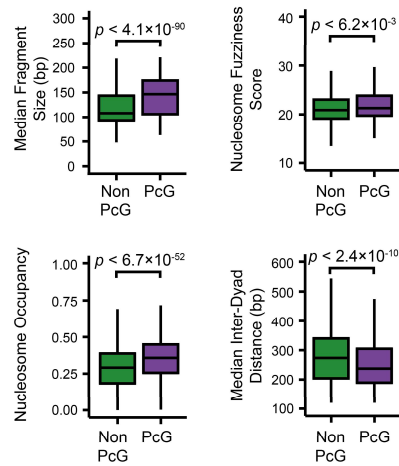

### Supplemental Figure S2. Chromatin accessibility and nucleosome landscape features at distal elements bound by Polycomb.

- A) A metaplot analysis of ATAC-seq, DNase-seq and FAIRE-seq signal at PcG-occupied ( $n = 1229$ ) or PcG-free ( $n = 43134$ ) distal elements (left) compared with CGI promoters (right; as in 1D).
- B) Boxplots comparing the median ATAC-seq fragment sizes, NucleoATAC-derived nucleosome occupancy signal, nucleosome fuzziness and median inter-dyad distances for PcG-occupied ( $n = 4020$ ) or non-PcG ( $n = 10251$ ) CGI promoters.

## Supplemental Figure S3

A

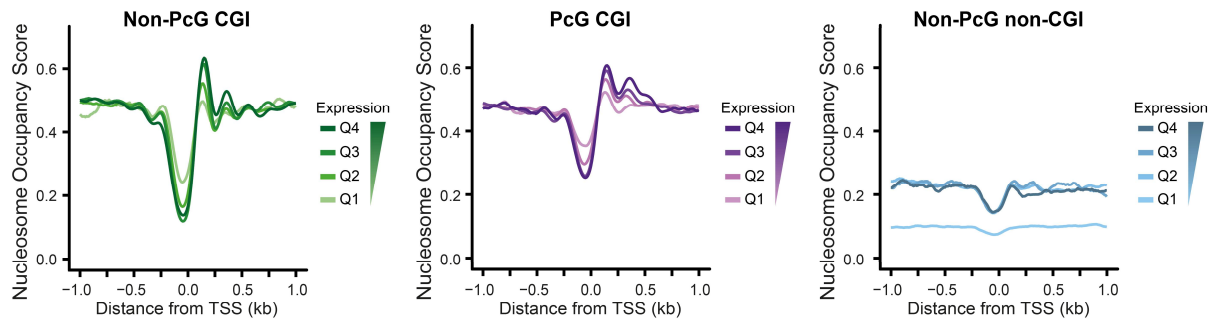

### Supplemental Figure S3. Nucleosome landscape of expression-matched PcG-bound or PcG-free promoters.

A) A metaplot analysis of wild type mouse ESC NucleoATAC-derived nucleosome occupancy scores at non-PcG CGI, PcG-bound CGI and non-CGI PcG-free promoters of different gene expression quartiles (Q1 lowest -> Q4 highest).

## Supplemental Figure S4

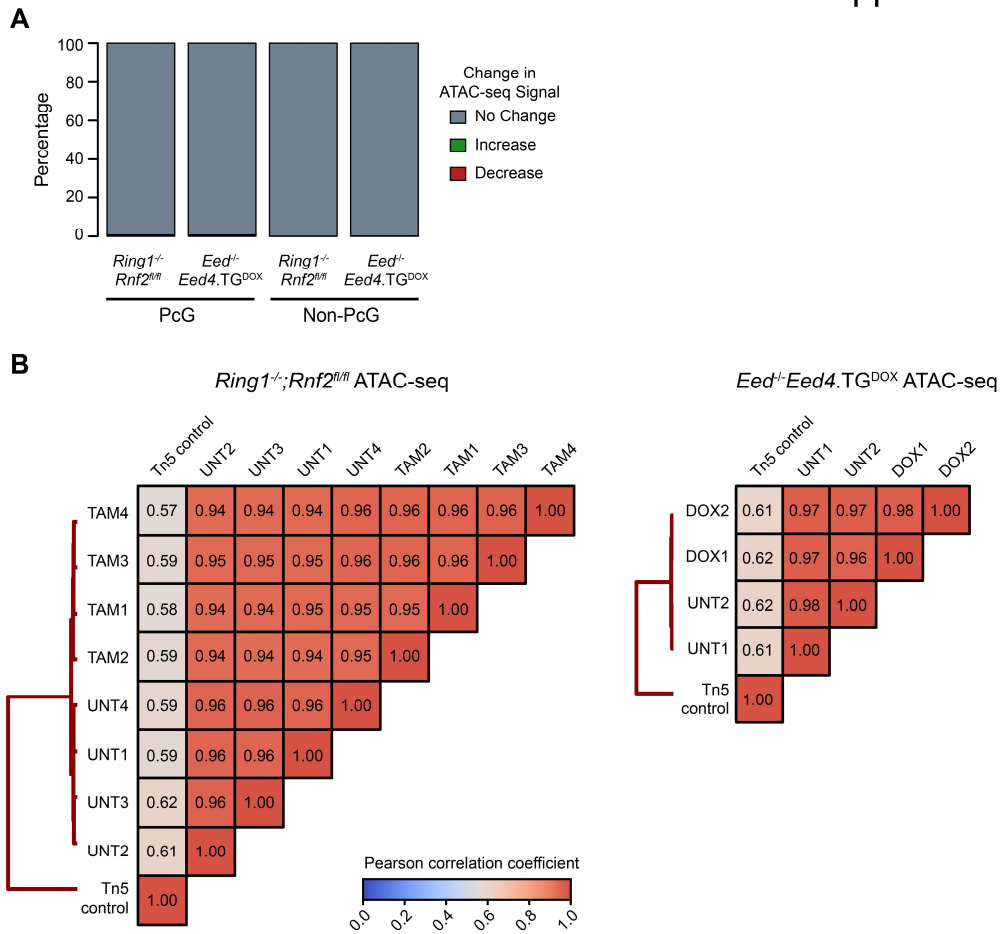

### Supplemental Figure S4. Statistical analysis and reproducibility of ATAC-seq datasets.

- A) A barplot depicting the number of significant changes in ATAC-seq signal at PcG or Non-PcG CGI promoters after ablation of PRC1 (*Ring1<sup>-/-</sup>;Rnf2<sup>fl/fl</sup>*) or PRC2 (*Eed<sup>-/-</sup>;Eed4.TG<sup>DOX</sup>*).
- B) Pearson correlation matrices for biological replicate ATAC-seq signal at wild type ESC ATAC hypersensitive sites for *Ring1<sup>-/-</sup>;Rnf2<sup>fl/fl</sup>* and *Eed<sup>-/-</sup>;Eed4.TG<sup>DOX</sup>* ATAC-seq experiments.

## Supplemental Figure S5

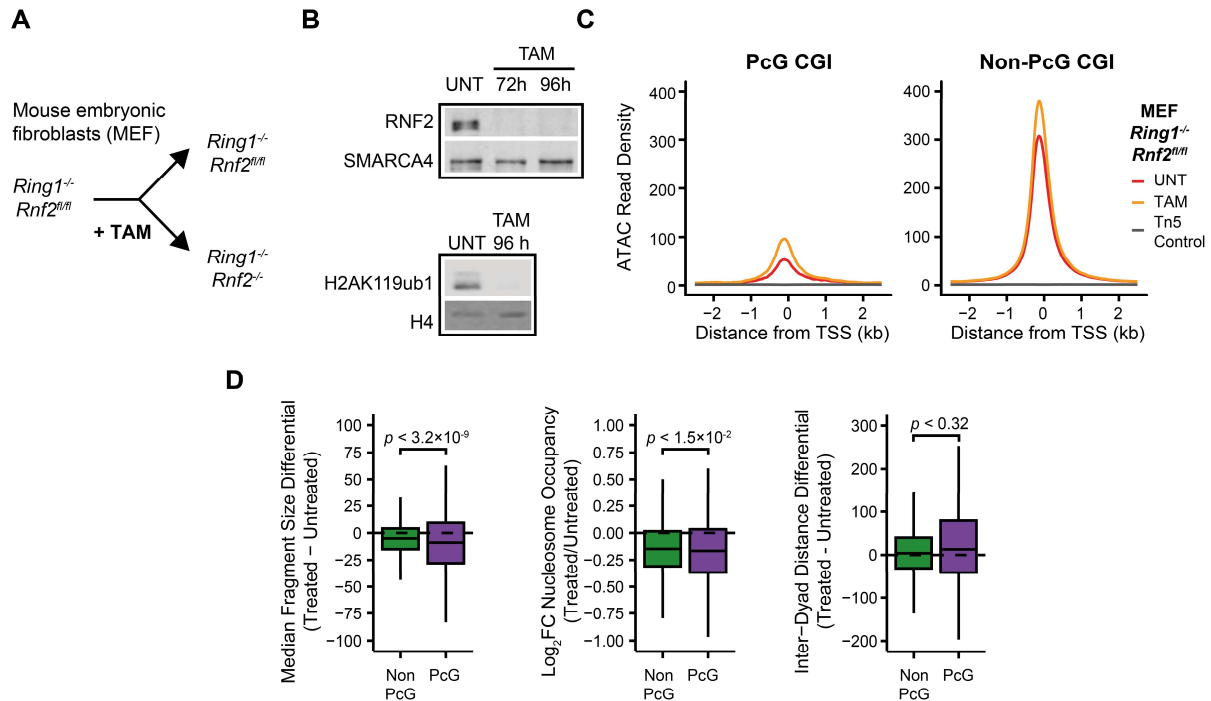

### Supplemental Figure S5. Analysis of chromatin accessibility and the nucleosome landscape in PRC1-null mouse embryonic fibroblasts.

- A) A schematic depicting the treatment of  $Ring1^{-/-}; Rnf2^{fl/fl}$  mouse embryonic fibroblasts (MEFs) with 4-hydroxytamoxifen (TAM) to generate PRC1-null MEFs.
- B) A Western blot analysis of untreated and TAM-treated  $Ring1^{-/-}; Rnf2^{fl/fl}$  MEFs for RNF2 (upper) and H2AK119ub1 (lower) at different time points. 96 hours after TAM treatment was used for all future experiments.
- C) A metaplot analysis for  $Ring1^{-/-}; Rnf2^{fl/fl}$  MEF ATAC-seq before and after tamoxifen (TAM) treatment at H3K27me3-positive (PcG;  $n = 1438$ ) or H3K27me3-negative CGI promoters (Non-PcG;  $n = 10118$ ).
- D) Quantitation of differences in median ATAC-seq fragment sizes, NucleoATAC-derived nucleosome occupancy, and inter-dyad distances for PcG and non-PcG CGI promoters in  $Ring1^{-/-}; Rnf2^{fl/fl}$  MEF ATAC-seq before and after TAM treatment.

## Supplemental Figure S6

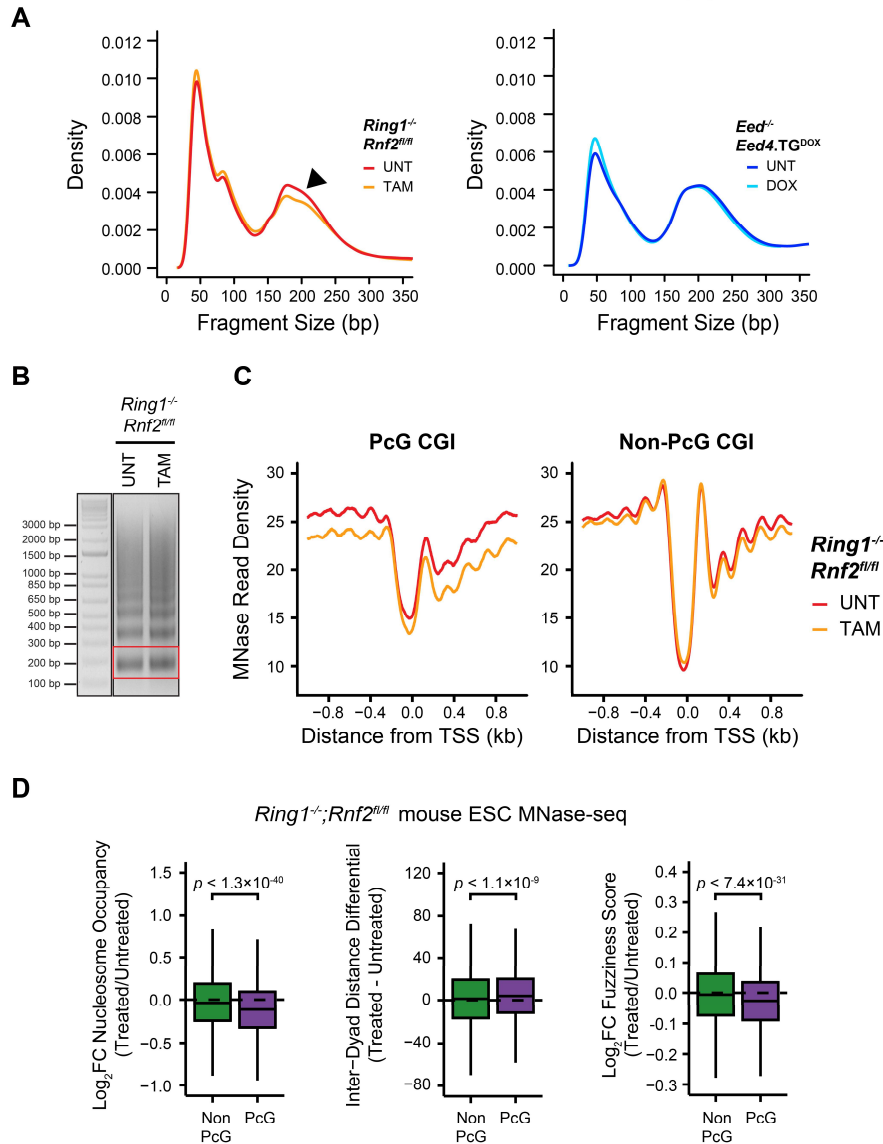

### Supplemental Figure S6. Deletion of PRC1 results in an altered nucleosome landscape.

- A) Frequency distribution plots for ATAC-seq fragment sizes in PcG-occupied CGI promoter intervals in *Ring1<sup>-/-</sup>;Rnf2<sup>fl/fl</sup>* and *Eed<sup>-/-</sup>;Eed4.TG<sup>DOX</sup>* ESC ATAC-seq with or without tamoxifen (TAM) or doxycycline (DOX) treatment respectively. The arrow highlights loss of mono-nucleosome-sized fragments in the *Ring1<sup>-/-</sup>;Rnf2<sup>fl/fl</sup>* experiment.
- B) An exemplar agarose gel (1.5 %) electrophoresis of MNase-digested native chromatin of a single replicate of MNase-seq library construction for *Ring1<sup>-/-</sup>;Rnf2<sup>fl/fl</sup>* ESCs. The red box highlights the mono-nucleosome fraction that was size-selected during library preparation.
- C) A metaplot analysis for *Ring1<sup>-/-</sup>;Rnf2<sup>fl/fl</sup>* MNase-seq before and after TAM treatment at PcG-occupied ( $n = 4020$ ) or PcG-free ( $n = 10251$ ) CGI promoters centred on the TSS.
- D) Comparison of differences in MNase-seq derived measurements of nucleosome occupancy, inter-dyad distance and nucleosome fuzziness for PcG and non-PcG CGI promoters in *Ring1<sup>-/-</sup>;Rnf2<sup>fl/fl</sup>* ESCs before and after TAM treatment.

## Supplemental Figure S7

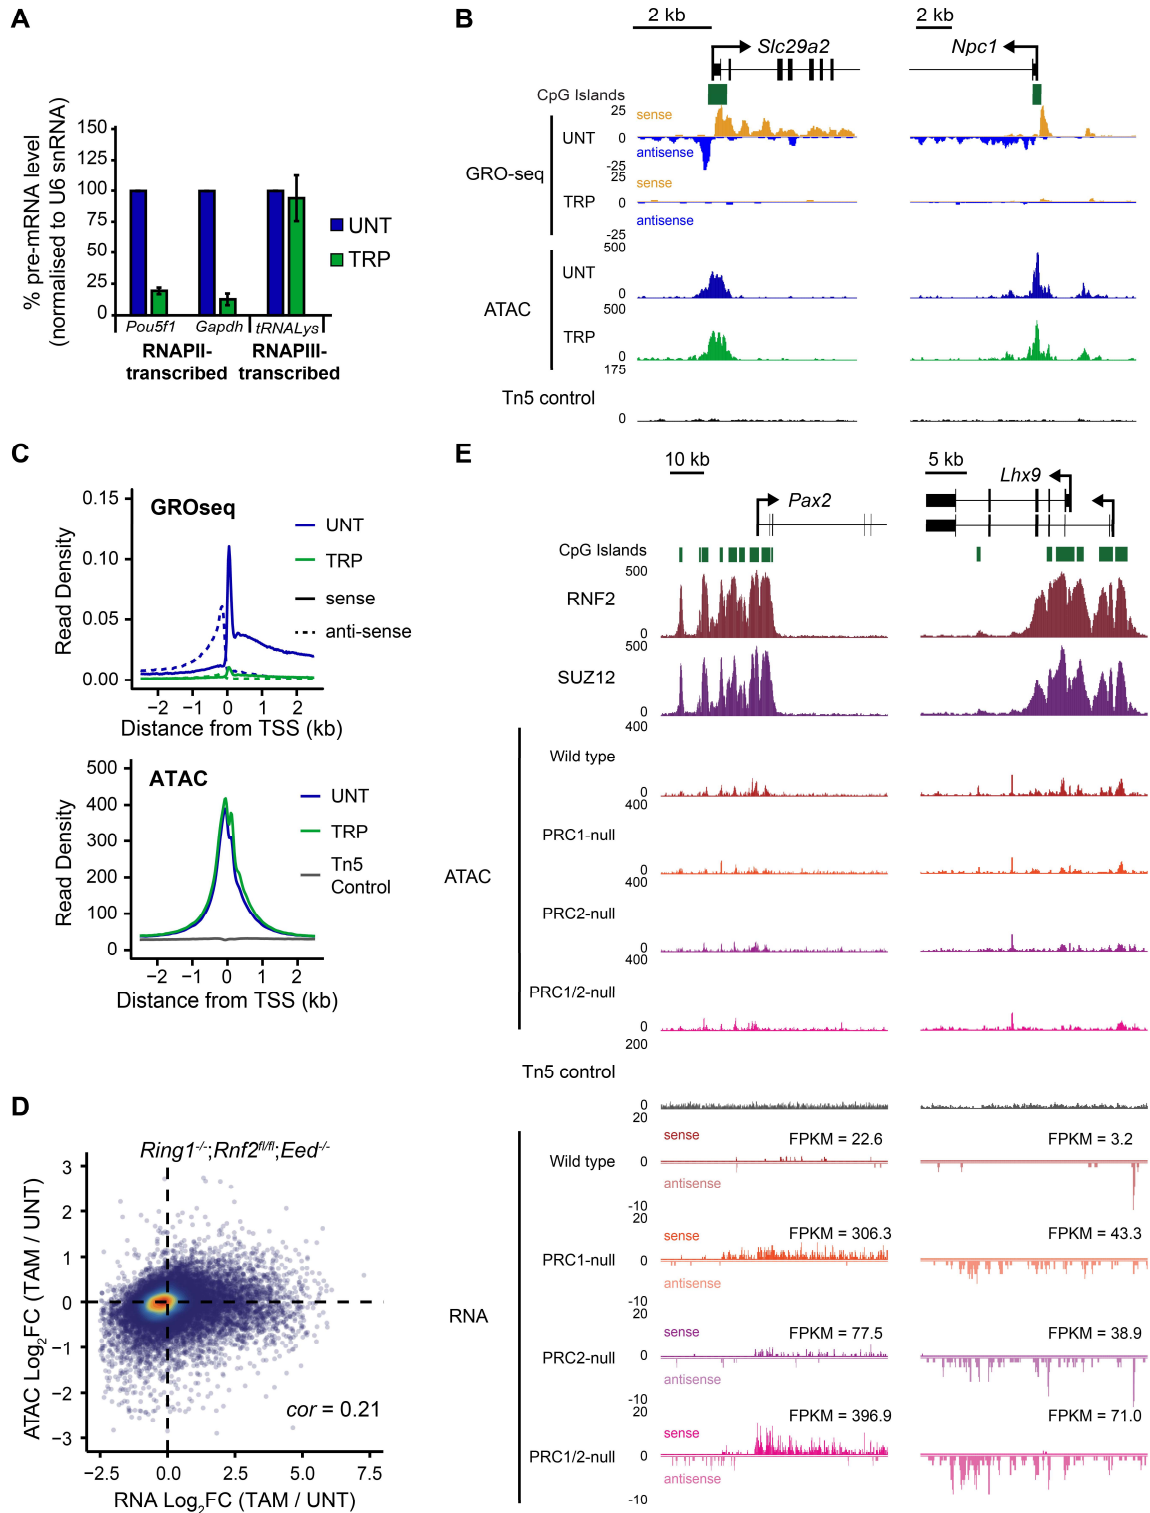

### Supplemental Figure S7. Promoter accessibility is independent of transcriptional activity.

A) Quantitative real-time reverse transcriptase PCR for *Pou5f1*, *Gapdh* and *tRNA-Lys* genes following treatment of mouse E14 ESCs with 500 nM triptolide (TRP) for 50 min, normalised to expression of U6 snRNA and untreated control cells.  $n = 3 \pm$  stdev.

- B) A genome screenshot at two gene promoters depicting RNA polymerase II engagement (GRO-seq; Jonkers et al. 2014) and ATAC-seq following TRP treatment.
- C) A metaplot analysis for GRO-seq and ATAC-seq data following TRP treatment at CGI TSS ( $n = 14271$ ).
- D) A scatterplot comparing the log<sub>2</sub> fold change in gene expression (RNA) and chromatin accessibility (ATAC) for CGI promoters in the *Ring1*<sup>-/-</sup>;*Rnf2*<sup>fl/fl</sup>;*Eed*<sup>+/-</sup> ESCs after tamoxifen (TAM) treatment.
- E) A genome screenshot for *Ring1*<sup>-/-</sup>;*Rnf2*<sup>fl/fl</sup> and *Ring1*<sup>-/-</sup>;*Rnf2*<sup>fl/fl</sup>;*Eed*<sup>+/-</sup> ATAC-seq and nuclear RNA-seq signal before and after TAM at two PcG target genes, *Pax2* and *Lhx9*, that are up-regulated after loss of PRC1 and/or PRC2. The normalised expression values (FPKM) for each gene in each cell line and treatment are annotated.
